# Supplementary material for: Novel Divisome-Associated Protein Spatially Coupling the Z-Ring with the Chromosomal Replication Terminus in Caulobacter crescentus
Source: PubMed Central journal article supplement (PMC7188993; doi:10.1128/mbio.00487-20), 2020-04-28

# Supplemental Figure S6

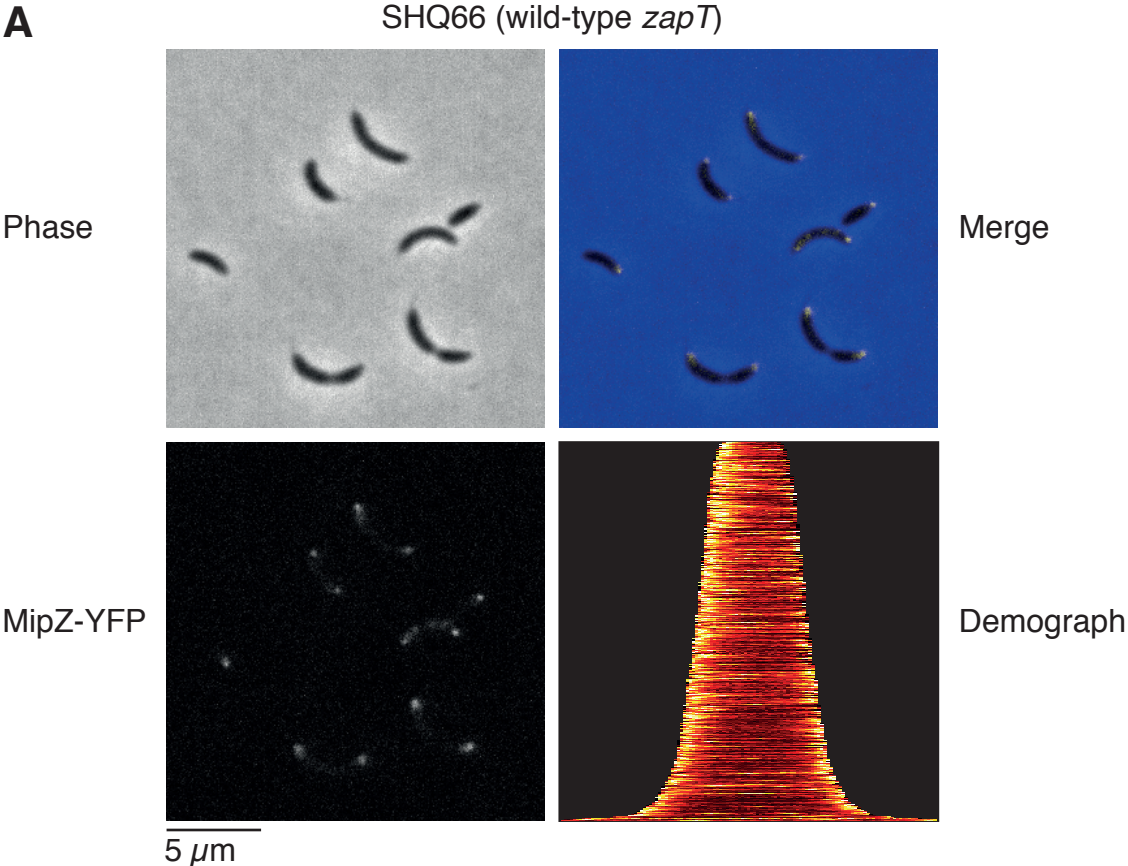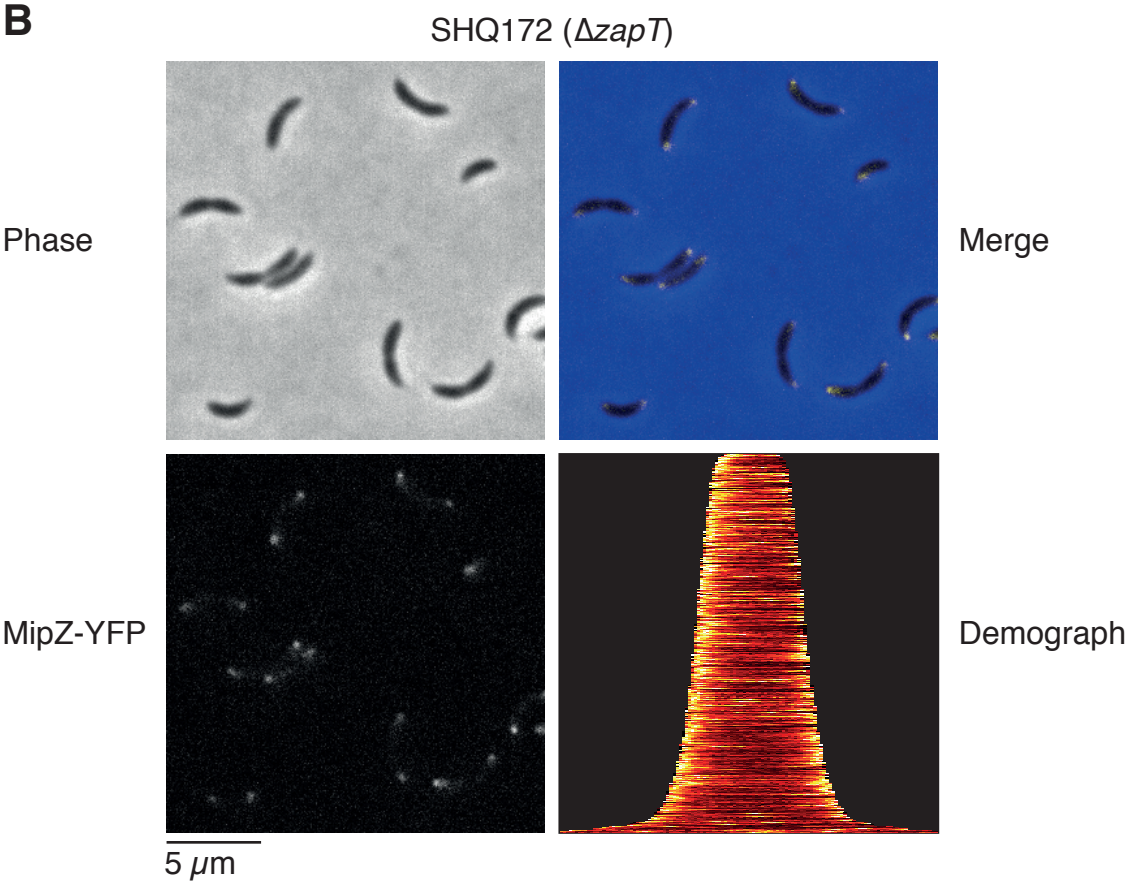

Supplement: mBio.00487-20-sf006.pdf [file mBio.00487-20-sf006.pdf]
